# Supplementary material for: MEMS Based Broadband Piezoelectric Ultrasonic Energy Harvester (PUEH) for Enabling Self-Powered Implantable Biomedical Devices
Source: PubMed Central journal article supplement (PMC4844957; doi:10.1038/srep24946), 2016-04-26
Supplement: srep24946-s1.pdf [file srep24946-s1.pdf]

Supplementary Information

# **MEMS Based Broadband Piezoelectric Ultrasonic Energy Harvester (PUEH) for Enabling Self-Powered Implantable Biomedical Devices**

Qiongfeng Shi<sup>1,2</sup>, Tao Wang<sup>1,2</sup> and Chengkuo Lee<sup>1,2\*</sup>

<sup>1</sup> Department of Electrical and Computer Engineering, National University of Singapore, 4 Engineering Drive 3, Singapore 117576

<sup>2</sup> Center for Intelligent Sensors and MEMS, National University of Singapore, 4 Engineering Drive 3, Singapore 117576

\*Corresponding Author: Chengkuo Lee

**E-mail: [elelc@nus.edu.sg](mailto:elelc@nus.edu.sg)**

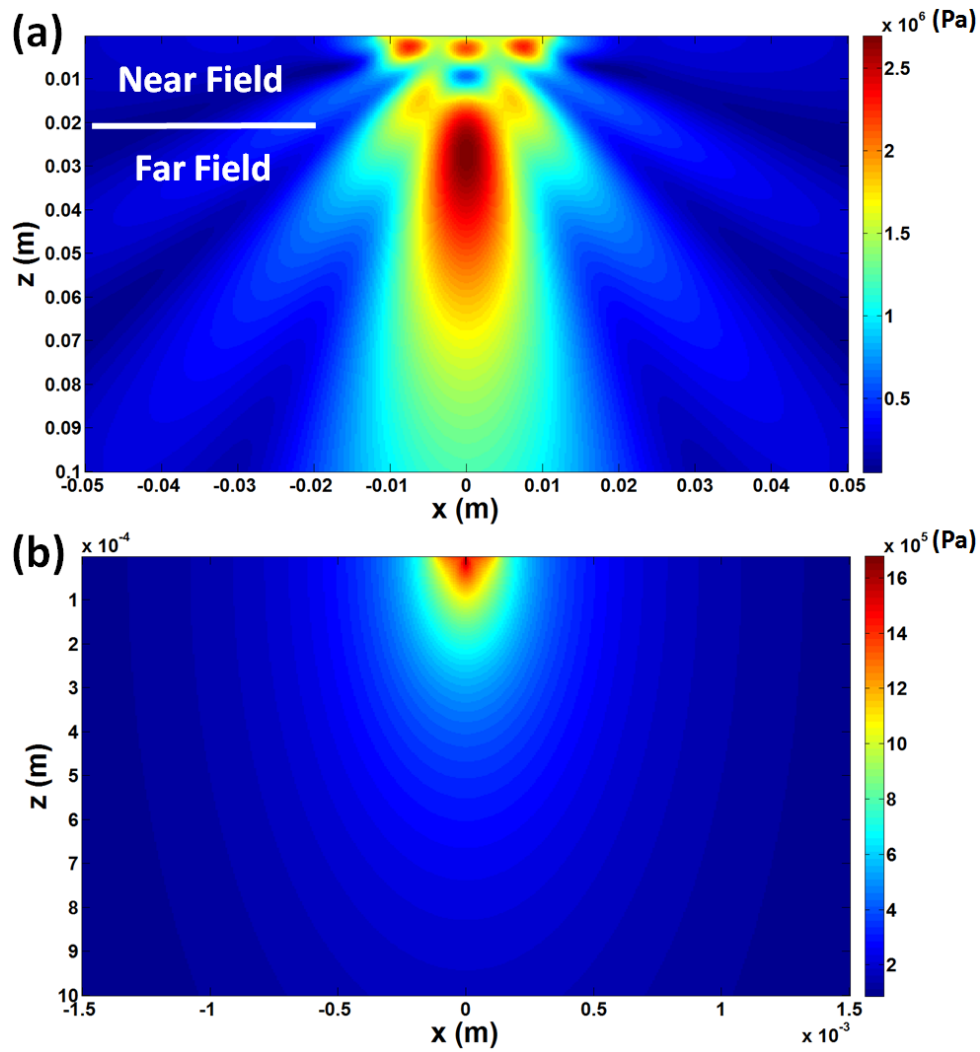

**Figure S1:** (a) Ultrasound pressure pattern of the bulk lead zirconate titanate (PZT) transducer (diameter 25 mm) by Transducer Array Calculation GUI (Karlsruhe Institute of Technology), showing the near field regime is within 2 cm. (b) Ultrasound pressure pattern of the proposed piezoelectric ultrasonic energy harvester (PUEH), showing the near field regime is within 100  $\mu\text{m}$  range. Input sinusoidal signal is 200 kHz, 2 V<sub>pp</sub>.

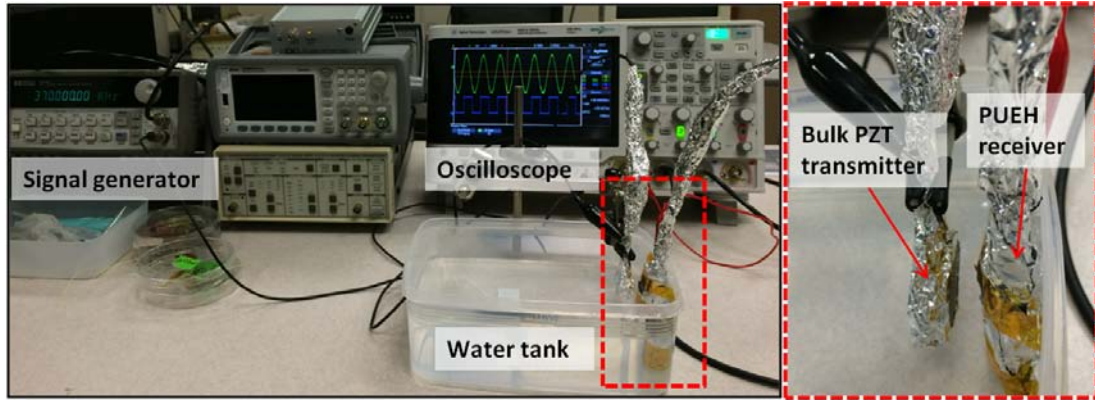

**Figure S2:** Photograph of testing setup of the power transfer system for voltage and power measurement.

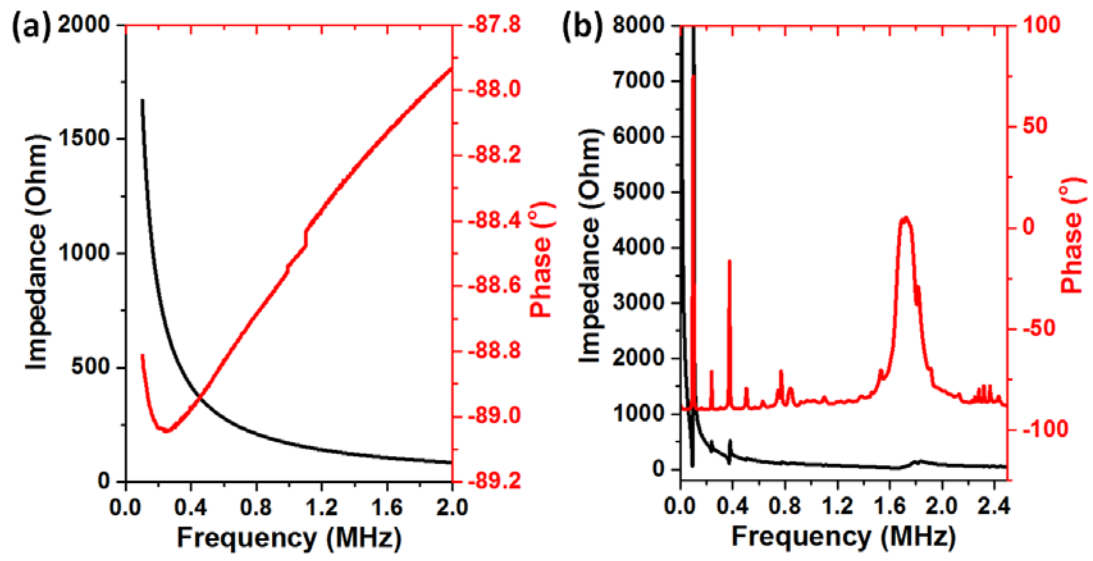

**Figure S3:** Impedance of (a) the PUEH and (b) bulk PZT transducer measured in water with respect to frequency.

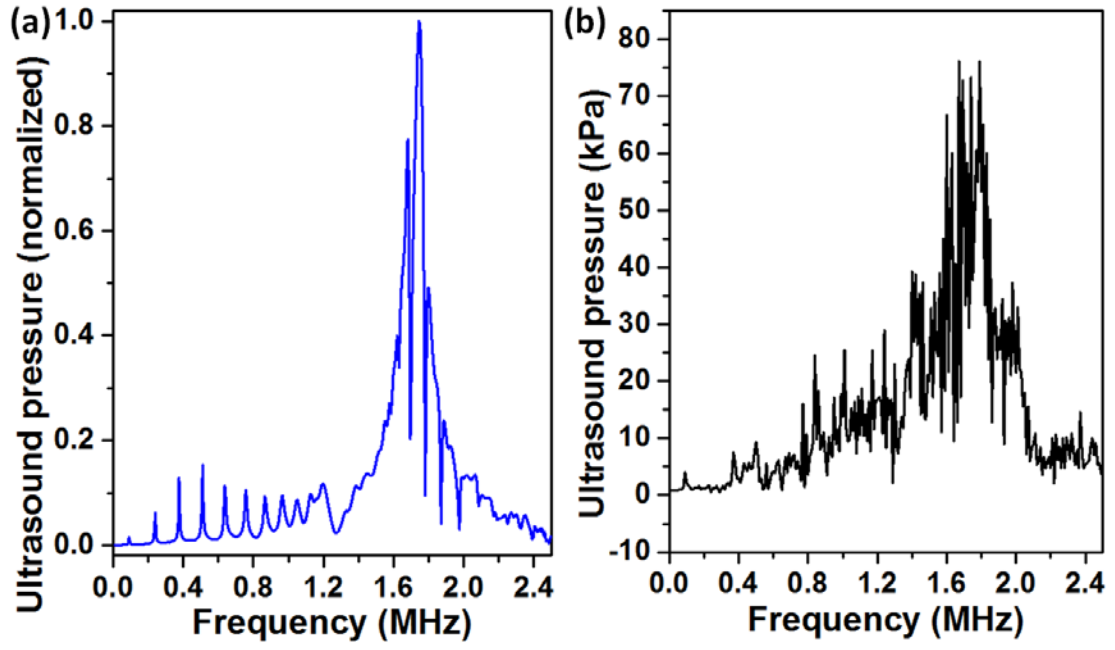

**Figure S4:** (a) Simulation and (b) testing results of the generated ultrasound pressure

by bulk PZT transducer at 1 cm distance.
